# Supplementary material for: Endoprosthetic Reconstruction in Ewing’s Sarcoma Patients: A Systematic Review of Postoperative Complications and Functional Outcomes
Source: MDPI journal article supplement (doi:10.3390/jcm11154612), 2022-08-08
Supplement: s1 [file s1]

**Table S1.** Summary of post-operative complications

| <b>Characteristic</b>                      | <b>Number</b> |
|--------------------------------------------|---------------|
| <b>Type I Failure: Soft Tissue</b>         |               |
| Restricted ROM                             | 6             |
| Wound healing complication                 | 2             |
| Joint instability (including dislocations) | 5             |
| Nerve lesion                               | 1             |
| Superficial infection                      | 5             |
| <b>Type II Failure: Aseptic loosening</b>  | 3             |
| <b>Type III Failure: Structural</b>        |               |
| Mechanical Failure                         | 2             |
| Periprosthetic Fractures                   | 1             |
| <b>Type IV: Deep Infection</b>             | 9             |
| <b>Type V: Local Tumour Progression</b>    | 3             |
| <b>Other Complications</b>                 |               |
| Amputation                                 | 4             |
| <b>Total complications</b>                 | 41            |

**Table S2.** Demographics of individual patients with Ewing's sarcoma across the 17 chosen studies.

| Case | Study               | Gender | Age | Location of Tumour | Prosthesis used | Other treatment                                                 | Complication                                                                                              |
|------|---------------------|--------|-----|--------------------|-----------------|-----------------------------------------------------------------|-----------------------------------------------------------------------------------------------------------|
| 1    | Benevenia 2015 [14] | -      | 16  | Proximal Humerus   | Repiphysis®     | Neoadjuvant chemotherapy                                        | Contracture                                                                                               |
| 2    | Benevenia 2015 [14] | -      | 11  | Distal femur       | Repiphysis®     | Neoadjuvant chemotherapy                                        | Contracture, Deep infection                                                                               |
| 3    | Vijayan 2011 [15]   | F      | 4   | Distal femur       | Stanmore        | Neo adjuvant chemotherapy                                       | Joint instability, flexion deformity                                                                      |
| 4    | Torner 2016 [16]    | F      | 12  | Proximal femur     | MUTARS®         | Neo adjuvant + adjuvant chemotherapy                            | -                                                                                                         |
| 5    | Hanna 2010 [17]     | M      | 25  | Femoral diaphysis  | Stanmore        | Neo adjuvant chemotherapy + radiotherapy                        | -                                                                                                         |
| 6    | Hanna 2010 [17]     | M      | 12  | Femoral diaphysis  | Stanmore        | Adjuvant chemotherapy                                           | -                                                                                                         |
| 7    | Hanna 2010 [17]     | F      | 10  | Femoral diaphysis  | Stanmore        | Neo adjuvant chemotherapy                                       | Deep infection                                                                                            |
| 8    | Yang 2017 [18]      | F      | 26  | Distal tibia       | Stanmore        | -                                                               | -                                                                                                         |
| 9    | Schiller 1995 [19]  | M      | 9   | Distal tibia       | HMRS            | Neo adjuvant chemotherapy                                       | Deep infection, joint instability                                                                         |
| 10   | Dotan 2010 [20]     | n/a    | 6   | Proximal femur     | Kotz            | Neoadjuvant chemotherapy + adjuvant chemotherapy + radiotherapy | Superficial infection (2), deep infection, contracture, dislocation, mechanical failure, wound dehiscence |
| 11   | Dotan 2010 [20]     | n/a    | 8   | Proximal femur     | Kotz            | Neoadjuvant chemotherapy + adjuvant chemotherapy + radiotherapy | Dislocation, aseptic loosening                                                                            |
| 12   | Dotan 2010 [20]     | n/a    | 14  | Proximal femur     | Kotz            | Neoadjuvant chemotherapy + adjuvant chemotherapy + radiotherapy | -                                                                                                         |

|    |                 |     |    |                |      |                                                                 |                                                                    |
|----|-----------------|-----|----|----------------|------|-----------------------------------------------------------------|--------------------------------------------------------------------|
| 13 | Dotan 2010 [20] | n/a | 9  | Proximal tibia | Kotz | Neoadjuvant chemotherapy + adjuvant chemotherapy + radiotherapy | Contracture                                                        |
| 14 | Dotan 2010 [20] | n/a | 11 | Distal femur   | Kotz | Neoadjuvant chemotherapy + adjuvant chemotherapy + radiotherapy | Deep infection                                                     |
| 15 | Dotan 2010 [20] | n/a | 11 | Proximal femur | Kotz | Neoadjuvant chemotherapy + adjuvant chemotherapy + radiotherapy | Aseptic loosening, superficial infection, peri prosthetic fracture |
| 16 | Dotan 2010 [20] | n/a | 11 | Proximal femur | Kotz | Neoadjuvant chemotherapy + adjuvant chemotherapy + radiotherapy | Superficial infection, deep infection                              |
| 17 | Dotan 2010 [20] | n/a | 14 | Proximal femur | Kotz | Neoadjuvant chemotherapy + adjuvant chemotherapy + radiotherapy | -                                                                  |
| 18 | Dotan 2010 [20] | N   | 9  | Distal femur   | Kotz | Neoadjuvant chemotherapy + adjuvant chemotherapy + radiotherapy | -                                                                  |
| 19 | Dotan 2010 [20] | n/a | 10 | Proximal femur | Kotz | Neoadjuvant chemotherapy + adjuvant chemotherapy + radiotherapy | -                                                                  |
| 20 | Dotan 2010 [20] | n/a | 7  | Proximal tibia | Kotz | Neoadjuvant chemotherapy + adjuvant chemotherapy + radiotherapy | Deep infection, contracture, mechanical failure, aseptic loosening |

|    |                      |     |    |                |          |                                                                 |                                                    |
|----|----------------------|-----|----|----------------|----------|-----------------------------------------------------------------|----------------------------------------------------|
| 21 | Dotan 2010 [20]      | n/a | 13 | Proximal femur | Kotz     | Neoadjuvant chemotherapy + adjuvant chemotherapy + radiotherapy | Deep Infection, amputation due to local recurrence |
| 22 | Yoshida 2011 [21]    | M   | 12 | Proximal tibia | Kotz     | Neo adjuvant + adjuvant chemotherapy and radiotherapy           | Amputation due to local recurrence                 |
| 23 | Shekkeris 2009 [22]  | F   | 42 | Distal tibia   | Stanmore | Neo adjuvant + adjuvant chemotherapy and radiotherapy           | -                                                  |
| 24 | Shekkeris 2009 [22]  | M   | 15 | Distal tibia   | Stanmore | Neo adjuvant + adjuvant chemotherapy and radiotherapy           | -                                                  |
| 25 | Raciborska 2021 [23] | M   | 6  | Distal tibia   | MUTARS   | Neo adjuvant chemotherapy + adjuvant chemotherapy               | -                                                  |
| 26 | Raciborska 2021 [23] | M   | 18 | Distal tibia   | MUTARS   | Neo adjuvant chemotherapy + adjuvant chemotherapy               | -                                                  |
| 27 | Raciborska 2021 [23] | M   | 15 | Distal tibia   | MUTARS   | Neo adjuvant chemotherapy + adjuvant chemotherapy               | -                                                  |
| 28 | Raciborska 2021 [23] | M   | 13 | Distal tibia   | MUTARS   | Neo adjuvant chemotherapy + adjuvant chemotherapy               | -                                                  |
| 29 | Yoshida 2008 [24]    | F   | 8  | Distal femur   | Stanmore | Neo adjuvant chemotherapy                                       | -                                                  |
| 30 | Yoshida 2008 [24]    | M   | 7  | Distal femur   | Kotz     | Neo adjuvant chemotherapy                                       | -                                                  |
| 31 | Yoshida 2008 [24]    | M   | 12 | Proximal tibia | Kotz     | Neo adjuvant chemotherapy                                       | -                                                  |

|    |                 |   |    |                   |          |                                                   |                                    |
|----|-----------------|---|----|-------------------|----------|---------------------------------------------------|------------------------------------|
| 32 | Erol 2021 [25]  | F | 38 | Periacetabular    | LUMiC    | Neo adjuvant chemotherapy + adjuvant chemotherapy | -                                  |
| 33 | Erol 2021 [25]  | F | 34 | Periacetabular    | LUMiC    | Neo adjuvant chemotherapy + adjuvant chemotherapy | Amputation due to local recurrence |
| 34 | Erol 2021 [25]  | M | 34 | Periacetabular    | LUMiC    | Neo adjuvant chemotherapy + adjuvant chemotherapy | Dislocation                        |
| 35 | Erol 2021 [25]  | F | 36 | Periacetabular    | LUMiC    | Neo adjuvant chemotherapy + adjuvant chemotherapy | -                                  |
| 36 | Erol 2021 [25]  | F | 46 | Periacetabular    | LUMiC    | Neo adjuvant chemotherapy + adjuvant chemotherapy | -                                  |
| 37 | Erol 2021 [25]  | F | 17 | Periacetabular    | LUMiC    | Neo adjuvant chemotherapy + adjuvant chemotherapy | -                                  |
| 38 | Puri 2012 [26]  | M | 17 | Femoral diaphysis | RESTOR   | Adjuvant chemotherapy                             | -                                  |
| 39 | Ayoub 1999 [27] | F | 10 | Proximal humerus  | Stanmore | Chemotherapy + Radiotherapy                       | -                                  |
| 40 | Ayoub 1999 [27] | F | 8  | Proximal humerus  | Stanmore | Chemotherapy + Radiotherapy                       | Amputation due to pain             |
| 41 | Ayoub 1999 [27] | M | 11 | Proximal humerus  | Stanmore | Chemotherapy + Radiotherapy                       | -                                  |
| 42 | Ayoub 1999 [27] | M | 7  | Proximal humerus  | Stanmore | Chemotherapy + Radiotherapy                       | Wound dehiscence                   |
| 43 | Ayoub 1999 [27] | F | 11 | Proximal humerus  | Stanmore | Chemotherapy + Radiotherapy                       | -                                  |
| 44 | Ayoub 1999 [27] | M | 8  | Proximal humerus  | Stanmore | Chemotherapy + Radiotherapy                       | -                                  |
| 45 | Ayoub 1999 [27] | M | 6  | Proximal humerus  | Stanmore | Chemotherapy + Radiotherapy                       | Radial nerve palsy                 |

|    |                 |   |    |                   |                |                                                       |                          |
|----|-----------------|---|----|-------------------|----------------|-------------------------------------------------------|--------------------------|
| 46 | Ayoub 1999 [27] | F | 10 | Proximal humerus  | Stanmore       | Chemotherapy + Radiotherapy                           | -                        |
| 47 | Wafa 2015 [28]  | F | 15 | Proximal humerus  | Stanmore       | Neo adjuvant + adjuvant chemotherapy                  | -                        |
| 48 | Wafa 2015 [28]  | F | 32 | Proximal humerus  | Stanmore       | Neo adjuvant + adjuvant chemotherapy                  | -                        |
| 49 | Wafa 2015 [28]  | F | 9  | Proximal humerus  | Stanmore       | Neo adjuvant + adjuvant chemotherapy                  | Superficial wound        |
| 50 | Wafa 2015 [28]  | F | 8  | Proximal humerus  | Stanmore       | Neo adjuvant + adjuvant chemotherapy                  | -                        |
| 51 | Wafa 2015 [28]  | F | 12 | Proximal humerus  | Stanmore       | Neo adjuvant + adjuvant chemotherapy                  | Periprosthetic infection |
| 52 | Wafa 2015 [28]  | F | 7  | Proximal humerus  | Stanmore       | Neo adjuvant + adjuvant chemotherapy                  | -                        |
| 53 | Wafa 2015 [28]  | F | 10 | Proximal humerus  | Stanmore       | Neo adjuvant + adjuvant chemotherapy                  | -                        |
| 54 | Ji 2019 [29]    | M | 10 | Distal femur      | Non hinged CCK | Neo adjuvant + adjuvant chemotherapy                  | -                        |
| 55 | Ji 2019 [29]    | M | 9  | Distal femur      | Non hinged CCK | Neo adjuvant + adjuvant chemotherapy                  | -                        |
| 56 | Lewis 1986 [30] | F | 10 | Femoral Diaphysis | Lewis          | Neo adjuvant + adjuvant chemotherapy and radiotherapy | -                        |
| 57 | Lewis 1986 [30] | F | 13 | Femoral diaphysis | Lewis          | Neo adjuvant + adjuvant chemotherapy and radiotherapy | -                        |
